# Supplementary material for: Broadening the Biocatalytic Toolbox—Screening and Expression of New Unspecific Peroxygenases
Source: MDPI journal article supplement (doi:10.3390/antiox11020223), 2022-01-24
Supplement: s1 [file s1]

# Supplementary Information

## Broadening the biocatalytic toolbox – Screening and expression of new unspecific peroxygenases

Sebastian Bormann<sup>1</sup>, Harald Kellner<sup>2</sup>, Johanna Hermes<sup>1</sup>, Robert Herzog<sup>2</sup>, René Ulrich<sup>2</sup>, Christiane Liers<sup>2</sup>, Roland Ulber<sup>4</sup>, Martin Hofrichter<sup>2</sup>, Dirk Holtmann<sup>1,3, 5</sup>

<sup>1</sup> Industrial Biotechnology, DECHEMA Research Institute, Theodor-Heuss-Allee 25, 60486 Frankfurt am Main, Germany

<sup>2</sup> Technische Universität Dresden, International Institute Zittau, Chair of Environmental Biotechnology, Markt 23, 02763 Zittau, Germany

<sup>3</sup> Institute of Bioprocess Engineering and Pharmaceutical Technology, Technische Hochschule Mittelhessen, Wiesenstraße 14, 35390 Gießen, Germany

<sup>4</sup> Institute of Bioprocess Engineering, University of Kaiserslautern, Gottlieb-Daimler-Strasse 49, 67663, Kaiserslautern, Germany

<sup>5</sup> Fraunhofer Institute for Molecular Biology and Applied Ecology (IME), Research Division Bioresources, Ohlebergsweg 12, 35392, Giessen, Germany

## Supplementary Results

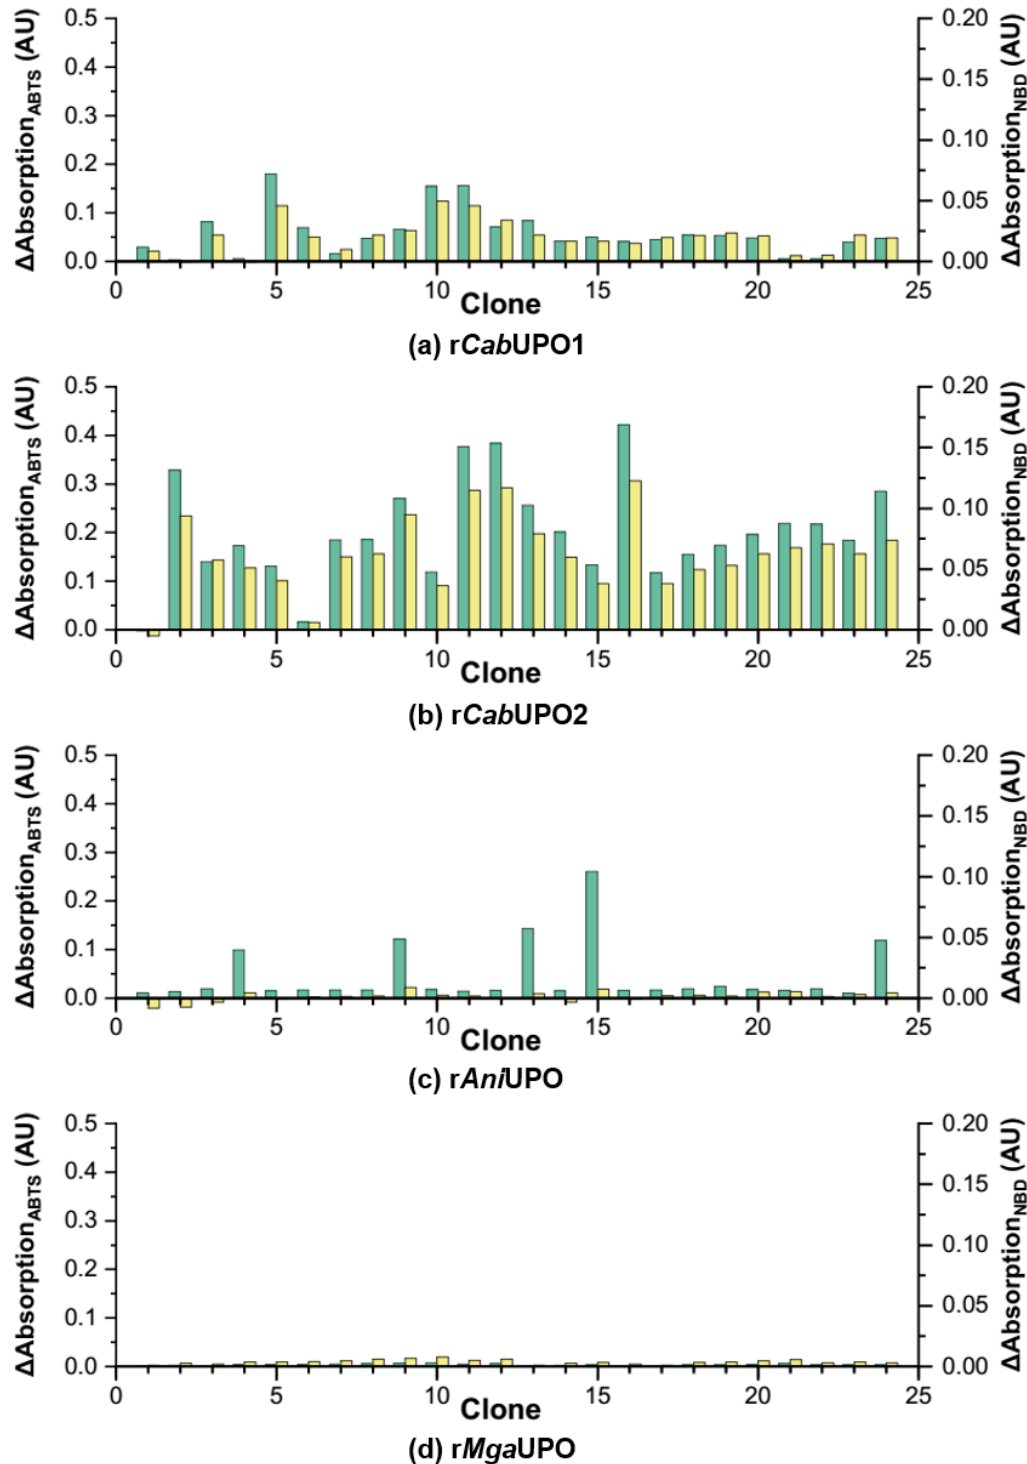

SI Figure S1: Screening of supernatant of *P. pastoris* clones transformed with UPO expression plasmids for activity using ABTS (■) and NBD (■) assays after cultivation in deep well plates for 94 h. The activity was determined by means of an endpoint measurement after 30 min of reaction time. *rMgaUPO* (d) exemplarily depicts a screening yielding no active clones. Clones chosen for subsequent larger scale production were: *rCabUPO* 1, clone 11, *rCabUPO* 2, clone 16, *rAniUPO*, clone 15.

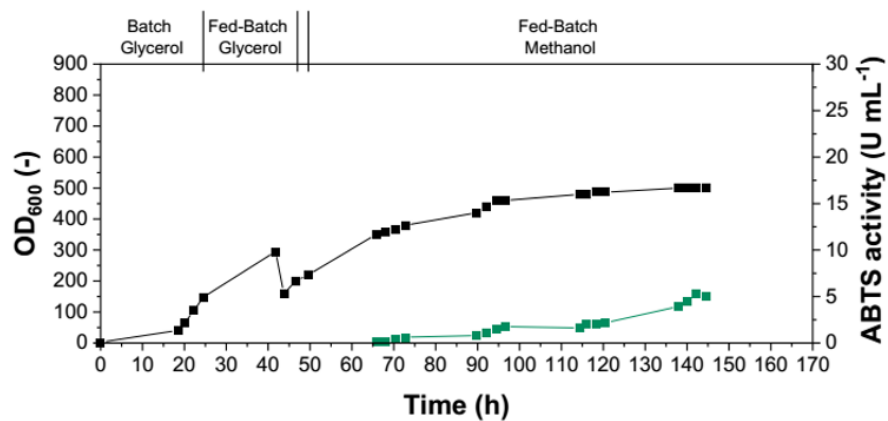

(a) *rCabUPO1*

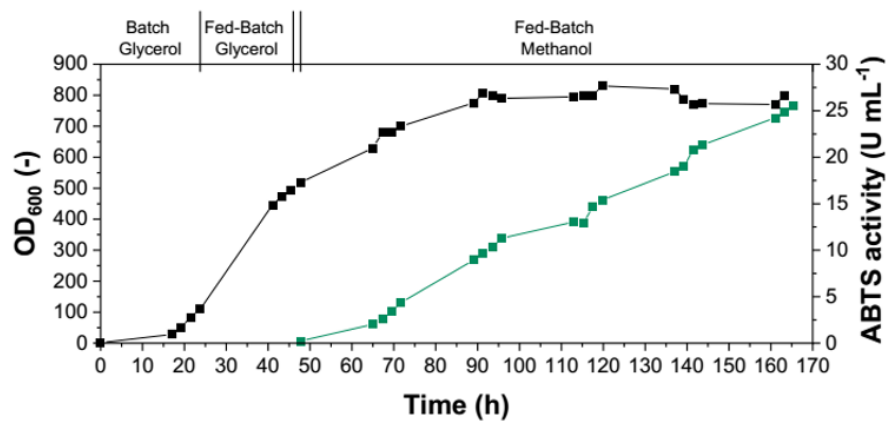

(b) *rCabUPO2*

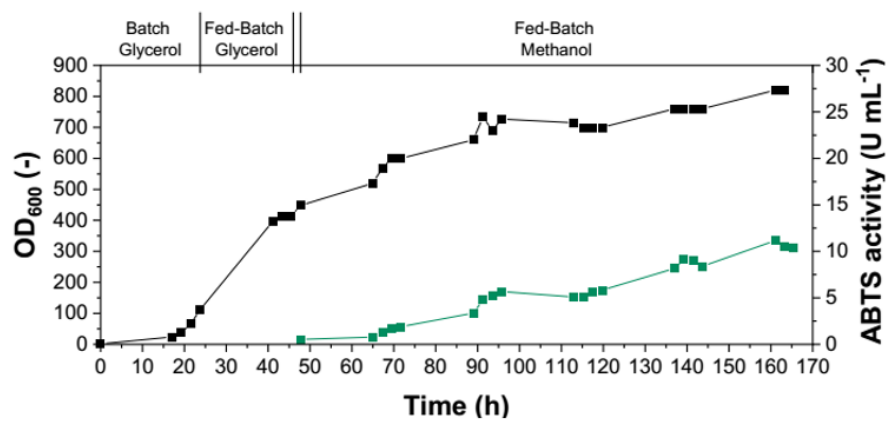

(c) *rAniUPO*

SI Figure S2: Production of recombinant UPOs with *P. pastoris* X33 in a bioreactor. Phases of the glycerol and methanol (fed)-batch process are indicated. A double bar marks the starvation phase preceding the methanol fed-batch. Cultivation was monitored by measurement of OD<sub>600</sub> (■) and enzyme production by determination of the ABTS activity (■). The drop in OD at 40 h for *rCabUPO1* was the result of losses of culture broth due to overpressure in the reactor. The loss of culture broth was compensated by aseptical addition of fresh medium, which lead to this drop in cell density.

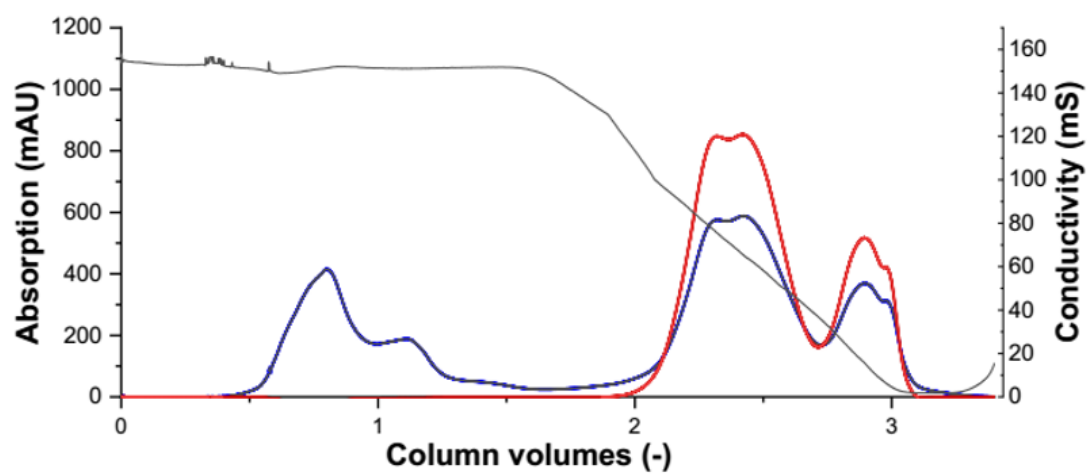

(a) rCabUPO1

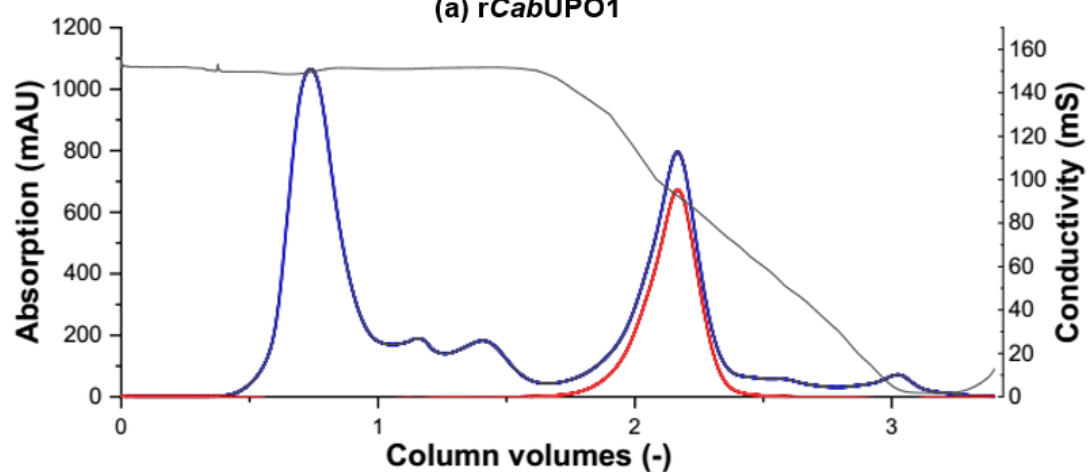

(b) rCabUPO2

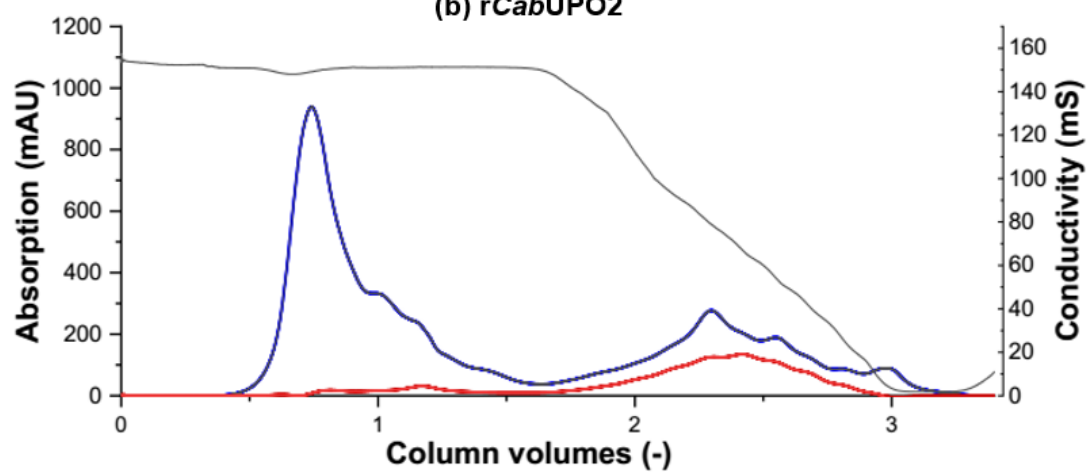

(c) rAniUPO

SI Figure S3: Purification of UPOs by hydrophobic interaction chromatography (HIC) using an ammonium sulfate gradient from 1 M to 0 M as indicated by the reduction in conductivity (—). Absorption was determined at 280 nm (—) and heme-specific absorption at 420 nm (—).

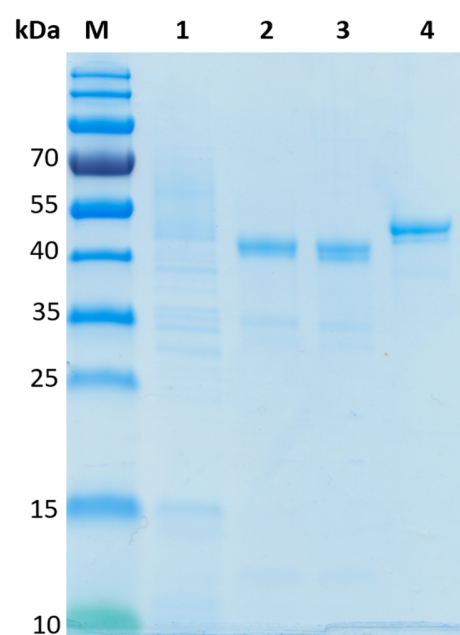

SI Figure S4: SDS-PAGE analysis of pooled fractions after HIC purification. Lanes: **M** PageRuler Prestained (ThermoFisher), **1** rAniUPO, **2** rCabUPO 1 peak 2.4 CV, **3** rCabUPO 1 peak 2.9 CV, **4** rCabUPO 2

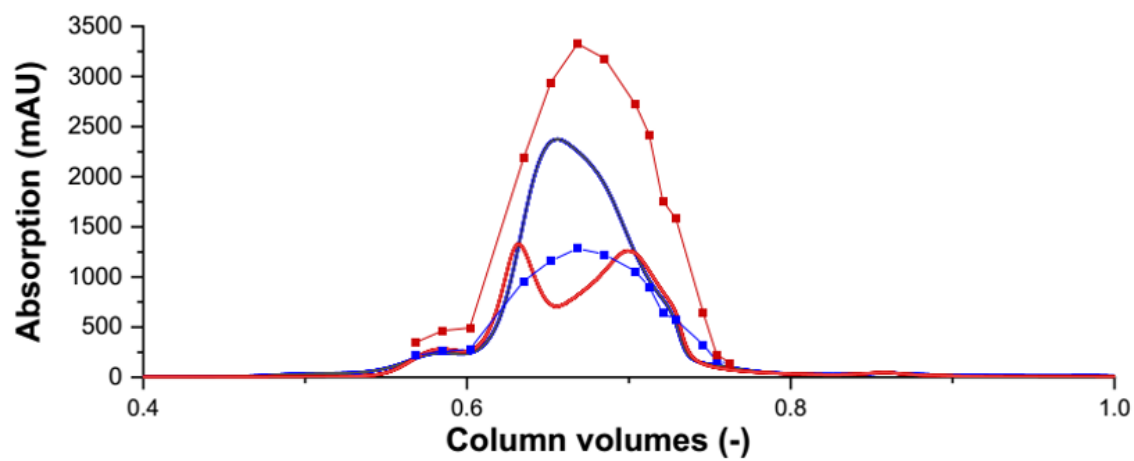

(a) rCabUPO1

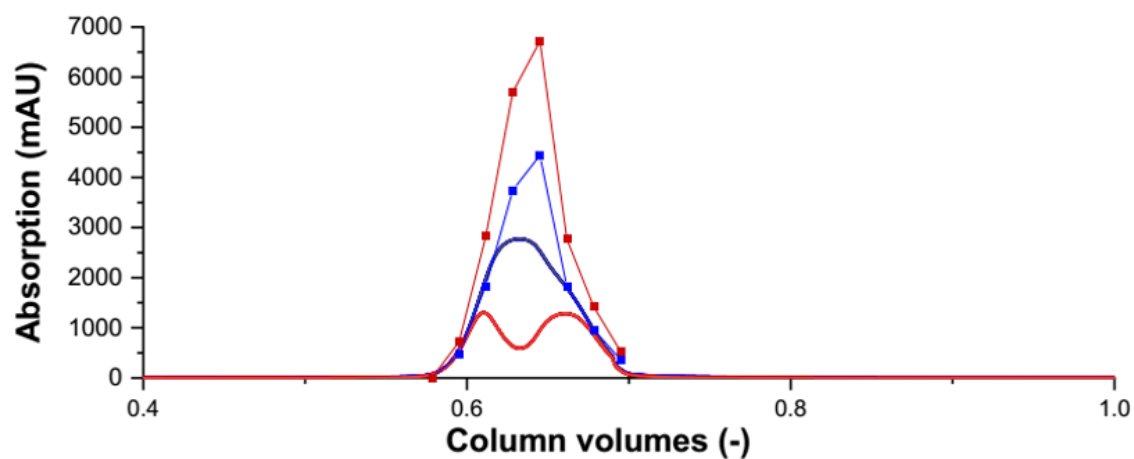

(b) rCabUPO2

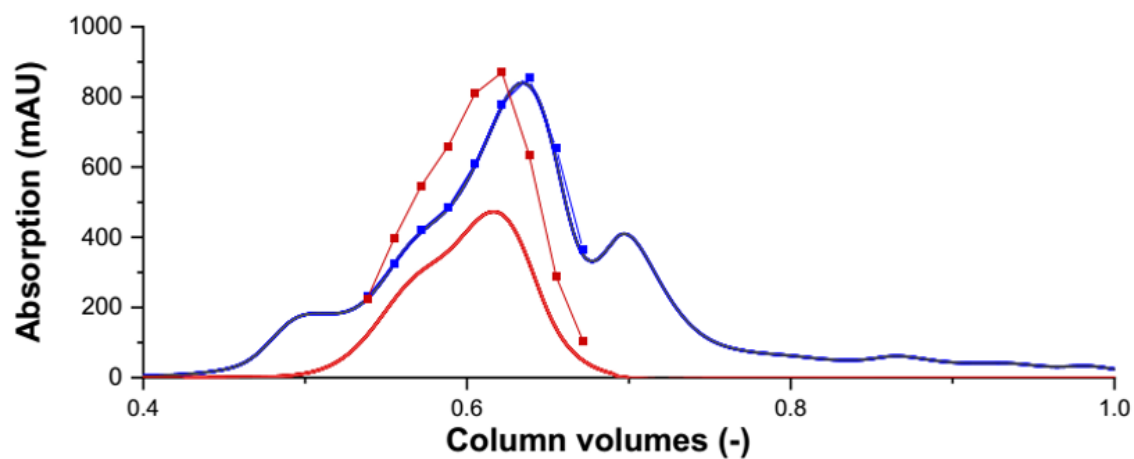

(c) rAniUPO

SI Figure S5: Purification of UPOs by size exclusion chromatography. Absorption was determined online (280 nm —, 420 nm —) and offline (280 nm ■, 420 nm ■).

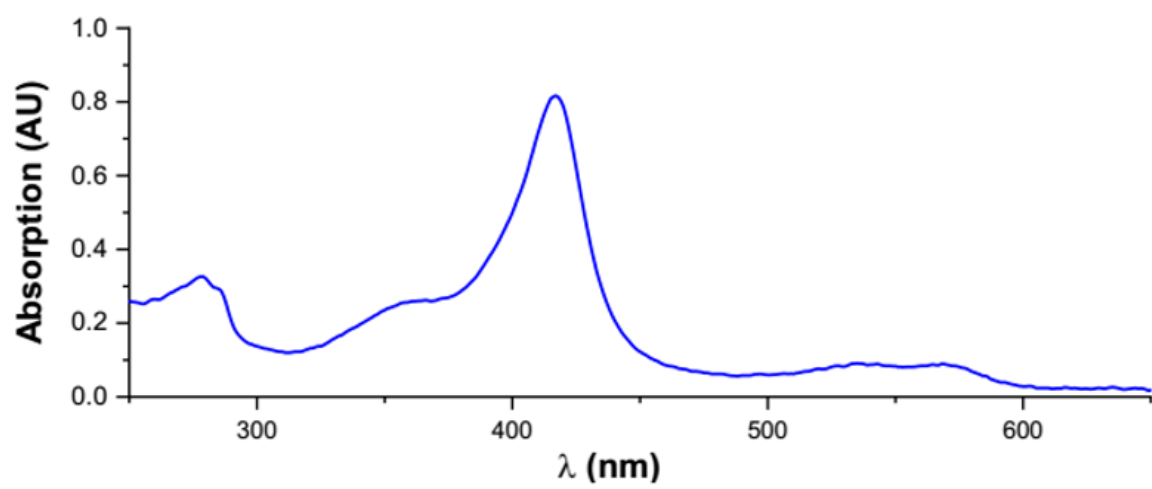

(a) rCabUPO1

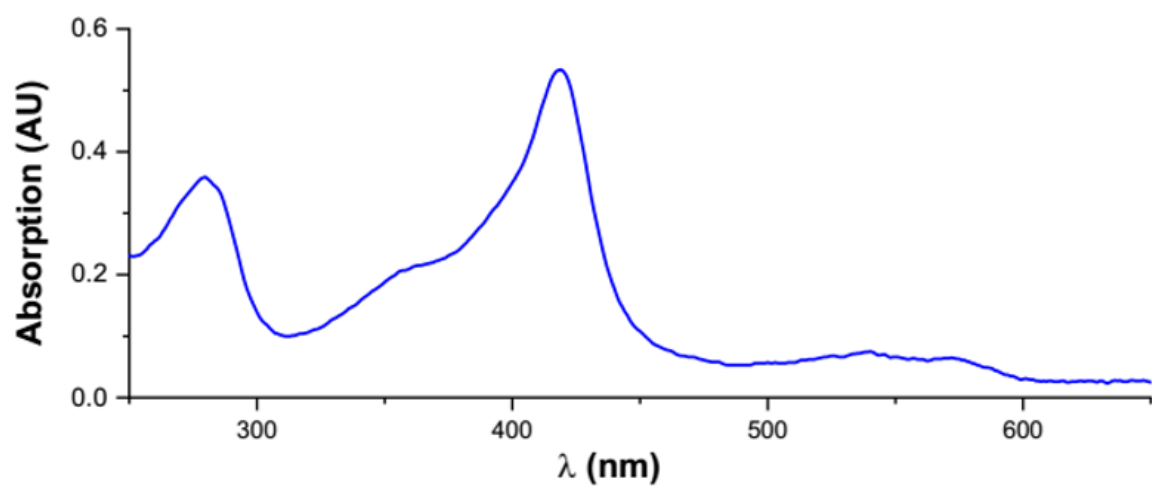

(b) rCabUPO2

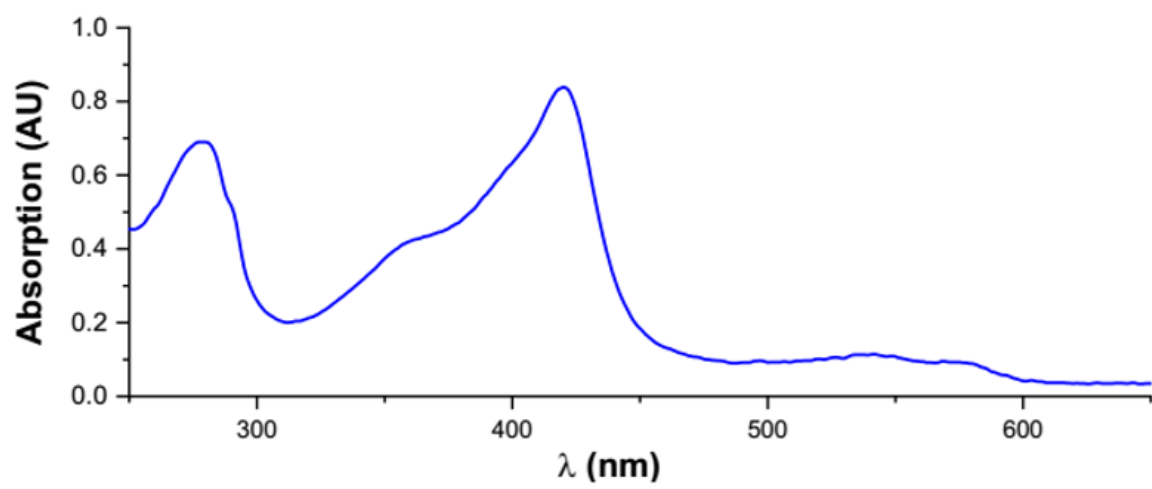

(c) rAniUPO

SI Figure S6: Absorption spectra of purified proteins.

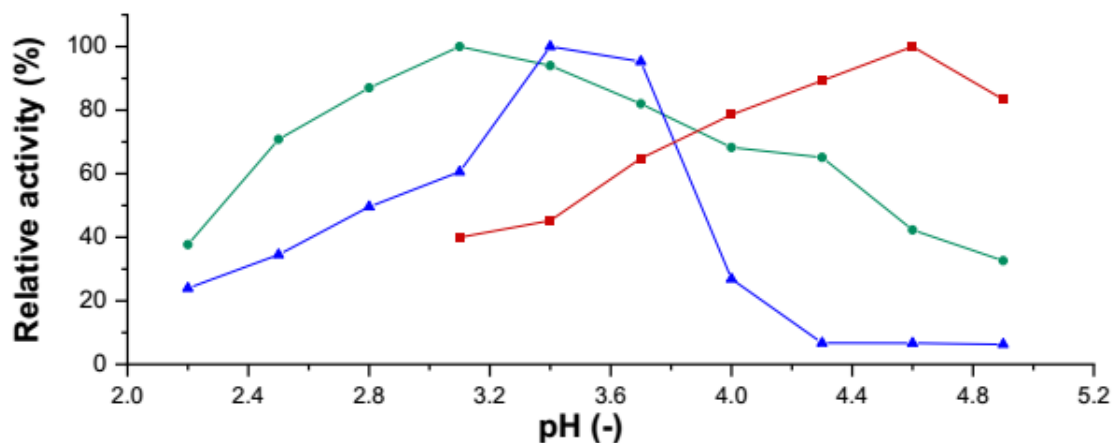

SI Figure S7: Determination of the pH-optimum of rCabUPO 1 (▲), rCabUPO 2 (■) and rAniUPO (●) using ABTS as a substrate. An activity of 100% corresponds to the highest activity measured for each individual enzyme.

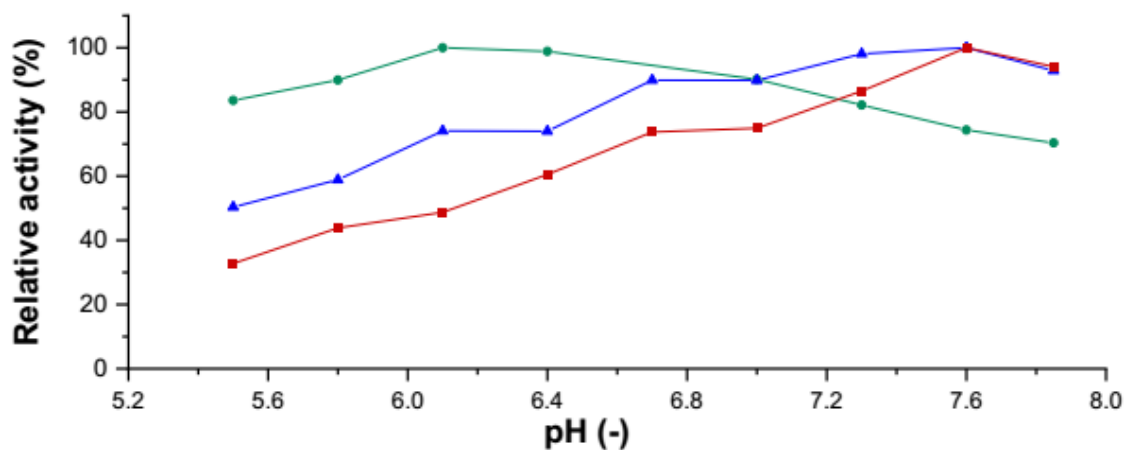

SI Figure S8: Determination of the pH-optimum of rCabUPO 1 (▲), rCabUPO 2 (■) and rAniUPO (●) using NBD as a substrate. An activity of 100% corresponds to the highest activity measured for each individual enzyme.

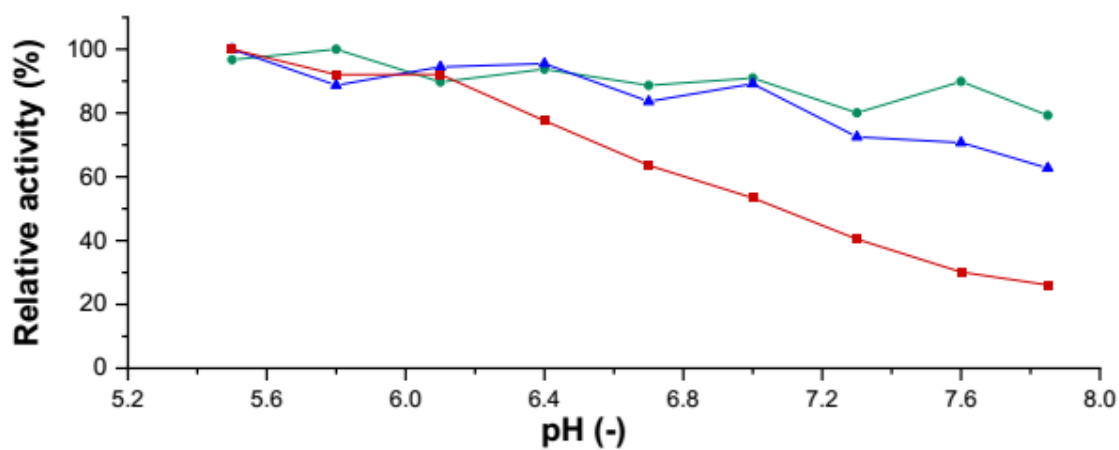

SI Figure S9: Determination of the pH-optimum of rCabUPO 1 (▲), rCabUPO 2 (■) and rAniUPO (●) using veratryl alcohol as a substrate. An activity of 100% corresponds to the highest activity measured for each individual enzyme.



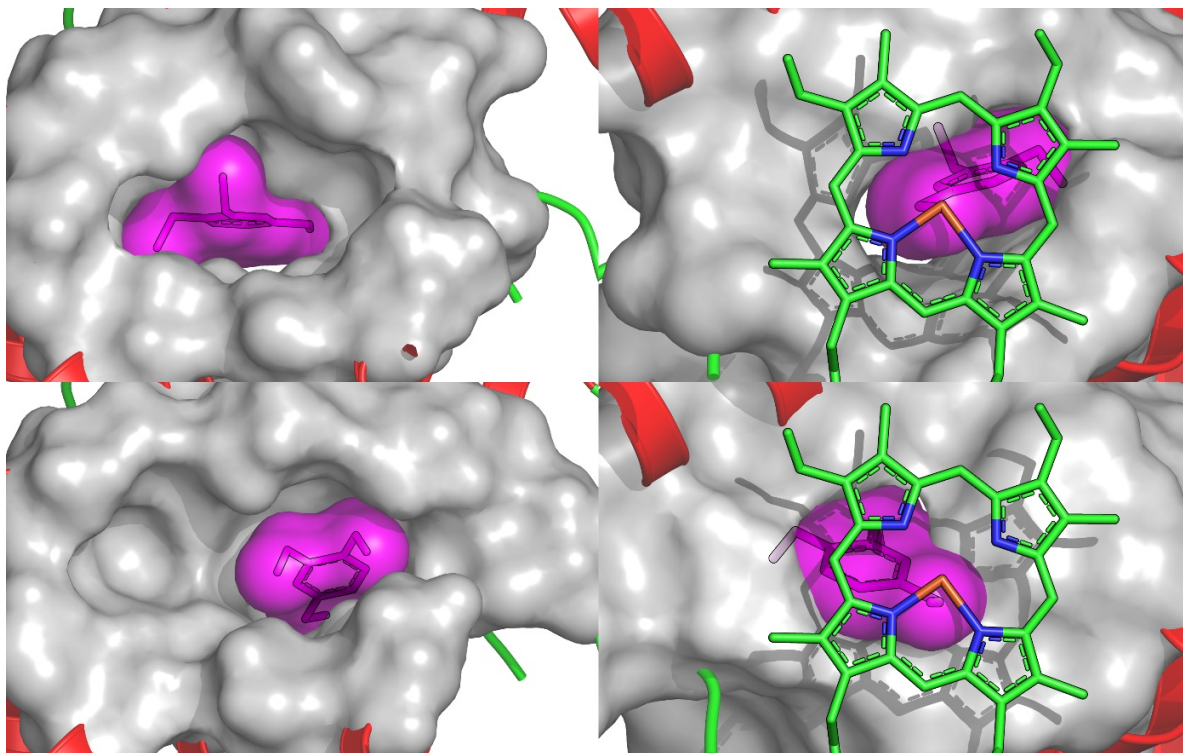

SI Figure S10: VA-dockingsimulation results for *AniUPO* (upper pictures) and *MroUPO* (lower pictures). Each picture on the left is a top-down view from the proteins surface into the substrate access channel. Pictures to the right are the respective bottom-up view. VA in magenta as sticks surrounded by its approximated SES. Heme as sticks; carbon = green, nitrogen = blue, iron = brown.

SI Table S1: Primers used for the construction of pPpB1-based UPO expression plasmids.

| Target  | Primer (5'-33)                                                                                | TM<br>°C |
|---------|-----------------------------------------------------------------------------------------------|----------|
| pPpB1   | tcaagaggatgtcagaatgc<br>CGTTTCGaataattagtgTTTTgatcttctcaag                                    | 60       |
| AniUPO  | aagatcaaaaaacaactaattattCGAAACGATGaagaccaccacc<br>ggcattctgacatcctcttgaTTA gccacgccagga       | 62       |
| AveUPO  | aagatcaaaaaacaactaattattCGAAACGATGaagaccctatcct<br>ggcattctgacatcctcttgaTTAgttatcggaatccttgac | 59       |
| CglUPO  | aagatcaaaaaacaactaattattCGAAACGATGcgccaccagcctg<br>ggcattctgacatcctcttgaTTAgaagccgaagtggg     | 62       |
| KdeUPO  | aagatcaaaaaacaactaattattCGAAACGATGaagttcgccacc<br>ggcattctgacatcctcttgaTTA gccgaagatctcgc     | 62       |
| MfiUPO  | aagatcaaaaaacaactaattattCGAAACGATGaagaacctctctcc<br>ggcattctgacatcctcttgaTTAcacatcagggagctg   | 61       |
| MgaUPO  | aagatcaaaaaacaactaattattCGAAACGATGcagctcaagctga<br>ggcattctgacatcctcttgaTTAatggaagacgatgccg   | 62       |
| CabC27  | aagatcaaaaaacaactaattattCGAAACGATGatcagccagagcttc<br>ggcattctgacatcctcttgaTTAcagctggccgtag    | 62       |
| CabC32  | aagatcaaaaaacaactaattattCGAAACGATGgtgagcaagccc<br>ggcattctgacatcctcttgaTTAcagctggccgtaag      | 62       |
| ThaUPO1 | aagatcaaaaaacaactaattattCGAAACGATGaagtacctgctcagc<br>ggcattctgacatcctcttgaTTA ggcgccgatctg    | 62       |
| ThaUPO2 | aagatcaaaaaacaactaattattCGAAACGATGctgctgtccaac<br>ggcattctgacatcctcttgaTTAatcctcggagaacttctg  | 60       |

## DNA-Sequences of UPO genes

### UPO from *Aspergillus niger* (AniUPO)

ATGaagaccaccacccctcctgtgcctcgccgcgcgtctcaccaggttaacgccttccctcagcaggggcgc  
ccctcctcctctcccttgggtccccccccggccctaacgatgtgcgcgcgtccttgccccatgctgaacaccc  
tggtccaacccatggctacctgccccacacgggaaggacatcaccgagcagcacaccatcaacgcctgtac  
aacgcctcggcatcgaggaggagctcgccgtctacctgcaccaggaggcgtgaccaccaaccccgcccc  
taacgccaccaccttctccctcaacgatctgagccgcatgacatcctggagcatgatgcctccctgtccc  
gccaggacgccttcttcggcgataaaccatgacttcaaccagaccatcttcgatgagaccgcctcctactgg  
accagccccatcatcgacgtcaagcaggccgcctgagccgccaggctcgtgttaaccagcatggccac  
caaccccaactacaccatgtccgagctgggcaactccttctcctacggcgagaccgcgcctacatcatcg  
tcctcggcgacaaggagaagggcctcgtgaaccgctcccgcgtggagtacctgttcgagaacgagcgccgtg  
cctctcgacctgggctgggtcccggtgccaaggagaacatcaccttcgacgacctgtccaccatgctgcagcg  
catcatcaacgccaccggcggcgagtcaggattcgaccgtgagctggccaagcgcgggcggttcattgtgg  
gtccttggcgtggcTAA

### UPO from *Aspergillus versicolor* (AveUPO)

ATGaagacccctatcctgtccctggccgtgggcctggccggttggtgctgctgcgttacccctgagtacctga  
gggcccgcagcgagtggcaggcccaagagtggatcgccctggccctgacgattcccgcggcccttgccctg  
gcctcaacacccctggccaacccatggctacctgcctcgcaacggcaccggcatcaccctcgacatcctgaag  
gatgccatgctcgagggttcaacatcgagcatagcgatgccgagctcctgttcaccagggccatccgcac  
ctccccctaactggcctctcaccctcagcttcgacctcgccgatctgggcccgcctggcatcctcgagcatg  
atatctccctctcccgctccgacgcctacttcgccgatcctaacccttcaacgagaccgtctgggcccgcg  
accgccagctacttcaccacccccatgatcacctggaccagctggccaaggcccgcctgggcccgtctcgc  
tacctccaagaagtccaacccccgagttcgagctgagctggctggccgatggcttcagctggggcgagtgcg  
ccagcttcttcgagatcatggccgatggcaccaccggcaccgctcgataagaagtacatcgagtactgggttc  
cgcaacgagcgcatgcctaccgagatcggtggcagcgccgcaacaccaccatgcaggggcagcgagcgccg  
caagtactccaacctgctgcaggaggccgcggcggtcaaggattccgataacTAA

### UPO from *Chaetomium globosum* (CglUPO)

ATGcgcaccagcctgctccccgccttggctgctgtgtgtccctgtgctggccggcttcgatacctgggcccc  
ccttgggtccctacgacgtccgtgggtccctgccccatgctgaacacccctaccaaccatggcttcttcctc  
acgatggccaggatatcgaccgcgagaccaccgagaacgccttgttcgatgcctccatgtcaacaagacc  
ctggccagcttccctgttcgacttcgccttgaccaccaacccctatcgccaacagcaccaccttcagcctgaa  
cgacctgggcaaccataacgtcctggagcacgacgcctccctgagccgcgtgacgcttaccacggcagcg  
tcctggccttcaaccacaccatcttcgaggagaccaagtcctactggaccgatgagaccgtgacctcaag  
atggccgccgatgcccgtactaccgcatcaagagctcccaggccaccaaccctacctaccagatgagcga  
gctcggcgacgccttcacctacggcgagtcgcgcgcctacgtcgtcctccttcggcgacaaggagagccaga  
ccgtgccccgctcctgggtcgagtggctgttcgagaaggagcagctgccccagcacctgggctggaagcgc  
cctgctacctccttcgagctgaacgatctggataagttcatggccctcatccagaactacaccaggagat  
cgaggagccctcctgcgagagccgcaagcagcgccgtaagcctcgcgcccttcccacttcggcttcTAA

### UPO from *Kretzschmaria deusta* (KdeUPO)

ATGaagttcgccaccctcctcttccccgcgcgtcgctcctcggcgctgcttgcccttacggcaccttctcccc  
tgagaagcccaccgacacccgcggcgtgtgccctatgctgaacgcctggccaaccatggcttccctccctc  
gcgatggccgcgacatcaccgagaaccagaccgtgaccgcctcaacgacgcctgaacctcaccctgac  
ttcgccaggttccctcttcaccgcgcgcctctccaaccctaagcctaacgccaccaccttcaacctcga

tcacctggaccgccacgacctcttcgagcatgacggcagcctgagccgccaggacgcctacttcggccagt  
ggtcccgccttcaacgccaccgtgtggaactggaccatgcagtactacaccggcgatgtgctcgacgtccag  
atgatcgccaacagccgcgcccagcgcgccatgagaagcaacctgaccaacccccgagtacaagctgtccgt  
cgtgggctacgacttcagcgtcgccgagaacgccgccatcctcagcatcctcgggcgataagggtcaccaga  
cctgccctaagggtgttcgcgattacctcttctccaaggaggagctgccctactcgtcggtggaagaag  
tccgagctccctatctccctgcaggatctgatcaccaccttccacgacatcgagctggccaccgccttccc  
cgccccctcctcctcctgacaactccggcgagatcttcggcTAA

#### **UPO from *Marasmius fiardii* (MfiUPO)**

ATGaagaacctcctctccctgatcttcatcgccgtcgccgtcacccgcctccaccgactctcaggtggactg  
gtccagccaccgctggcaggccccctggctccttccgatacccgcgcccttgccccgggtctcaacaccttg  
ccaacctatggcttctcctcctcgcaacggcgcaacatctccatccccatgatcctgcaggccggccatgag  
ggctaccacatcgagccctccatcctgaccatcgccgccaaagggtgggctgctgaccagccctagcgatca  
gcccaccaccttctcctcctgaggacatcaaggccacggcgatcgagcatgatgccagcctctcccgcc  
aggatatcgccctgggcgataacgtccacttcaacgagaccatcttcagcacctgggtcaacagcaacct  
cgctccgatgtgtacaacaccaccagcgccggccagggtcctccaggctcgtctgggtgatagcctgaagaa  
caaccctaacgtgaccaacaccgatctgaccgatgtcatcccgggcgccgagagcgccctctacctctccg  
tcatgggcgaccctatccagggcgctcgcccctaagaagttcgtgcagatcttcttcgcgaggagcgccctg  
cccatcgaggagggttggaagcgaccaacatcgacatcacctcaacgtcgtcgggcgccctcgtcgataa  
gaccttcgaggccgatcctgcctgggagcctaccggcaacaactgccctggcatccagctccctgatgtgT  
AA

#### **UPO from *Mycena galopus* (MgaUPO)**

ATGcagctcaagctgagctccctgatcgtcgccagcgtcgtgctcgtcggaagggtcaacgcctacgccgc  
ccccgctggccatgagttcatcgccccaccagcacccgaccagcgctcccttgccccgggtctcaacacc  
tcgccaacctatggctacctgcctcgccacggcgccaacttcaccgtgaccagatcatggatgccgcctc  
gccggcttcaacgtcaactgggatgccatcctcgtggccgccaagttcggcctgctcagcgggcgtgacgc  
caccaccttcgagaccatgtccctcggccccctggccctgcacaacctcgtcgagcacgacgcctccatct  
ccgcaacgacttcggccccgacggcacccggtgacaacgtgcaacttcaacgagaccaccttctccacctg  
gccaacgccaaacccccggcaaggattactacgatcctgtcagcgccggcgccgtccagcacgctagactggc  
tactccgtcgccaccaacctaacgtcaccaacaccagaaggagttcaagctgcgagccgagctccg  
ccctgtacctcagcatcttcggcgacccccctaccggcatcgccagcaaggagttcgtgcagatcttcttc  
cgcgaggagcgccctcccttcgcccagggttggtccaagccaccacctgatcgacagctccacctcga  
tcccatcggaacatcatccagaacgccagcgactggaccgagaccagtcctgcgagcctctcgtcctcg  
gtccggcatcgtcttccatTAA

#### **UPO 1 from *Candolleomyces aberdarensis* (CabUPO 1)**

ATGatcagccagagcttctgtgtccctgaccgtgctgctgctcggcctcgtcaacctgagccccgccttcgc  
cttccccagtagcgtccctggccggtctctccgcccgtgatctgaacgtcctcatccctcgctgaacg  
aggctgatcctcccacccctcccgccctctcgtttacaacggcaccaagctcgtccatgacgatgccac  
cccttcaaggcccccgagcagggtgatatcccgggcccttgccccggcctgaacaccttgccaacctatgg  
ctacctccctcataacggcgctcgccacccctagccagatcatcgaggccgtccaggagggttcaacatgg  
agcatgccaccgcctgttcgtcacctacgcgcgccacctcgtggacggcaacctcgtgaccgatctgctc  
tccatcgggcgagaagaccggcctgaccggcctggatcctcccgctcctgccatcgtgggcggttgaaacac  
ccatgccgtcttcgaggggcgacgcctccatgaccgcgcgcgacttcttcttcggcgataaccataacttca  
accagacctgttcgaccagttcgtggacttcagcaaccgcttcggcgggcggttctacaactacaccgtg  
gccgcccagctgcgttccagcgtatccaggagagcatcgccaccaacctcagttctccttcatctcccc  
ccgcttcttcaccgcctacgccgagagcaccttccctgtcaacttcttcgtggacggccgcgacccgaga

agaagctcgacatggaggccgccacctccttcattccgcgacggcaagtaccctcaggacttccatcgcgcc  
gcccagccttctccaccgagggatcgatatcgtaggctccgccaccctgtggcccctggtagaaaaccg  
cgacggcaaaatcaacaactacgtccccgaccctacctccgccgacttctccaccttctgctgctgtaca  
ccaacttcgtgaaccagaccatcggcgccctctaccctaaccacacggcggtgctccgccgcaacctgatc  
aagaacctccgcttcttctacagcggcatcgccgatgccggctgcgaggagctcttcccctacggccagct  
gTAA

#### **UPO 2 from *Candolleomyces aberdarensis* (CabUPO 2)**

ATGgtgagcaagcccttcgccctcctgaccacctacctgctgatcctgggcaccctctccacctccctcgc  
cttccccggcctccaggtccctaaccgcgccttgctgcgcgccaggaggggtgggttcccaggggtggcg  
gcagctccgagcaggggtgtggaccctcctcctcctcccgccctccttccctcaccggcaccaagctcgtc  
aacgatgccgatcacccttggcagccctgcgcgagggcgatatccgcggtccttgccccggcctcaacac  
cctggccagccacgggttacctgccccgcgacgggtgtcgccaccctgctcaaatacatcaccgccaccagg  
agggcttcaacttcgagaacaacgcgcgccatcgctcgccacctacctgggccatctcctcaacggcaacctg  
gtgaccgatctgctgtccatcggcggcgccacccttaagaccggccctcctcctccgccccctgctcatgc  
tgggcgtctcaacgtgcatggcaccttcgagggcgacgcggcatgaccgcgctgatgagttcttcggcg  
acaaccacagcttcaaccagaccctgttcgacaagttcgtggacttcagcaaccgctacggcgggccttc  
tacaacctcaccgtcgccggcgagctccgctacagccgatccaggacagcatcgccaccaacctgagtt  
ccagttcaagaacgtgcgcttcatcaccgcctacggcgagaccgtcttccctatcaacctgttcgtggatg  
gccgctgaccaccgaccgcaagctgtccatggaggatgccgccagcatcttccgcgatatgcgcttccct  
gatgacttccaccgctccgcgctcctgacctcaacgaggggtgccgaccagggtcctcgccgcccatccttg  
ggtgcctggcggtaacgccgacaaccaggtgaacaactacgtcgaggatcctgacagcgccgacttcaccc  
acctctgcccgtgtacgagttcgtgggtgggtccgtgcaggagctctacccaacctaccggcatcctg  
cgccgcaacctgatcaagaacctccattactgggtggaccggcgtaacgtgcgcttcggcgggctgcgatga  
gctcttcccttacggccagctgTAA

#### **UPO 1 from *Trichoderma harzianum* (ThaUPO 1)**

ATGaagtacctgctcagcctggctcgccatcagcaccctgagcaacatcggcgccgcccagctgctggatct  
ccctcctctcttcgatccctacgatccctaagttcgacgactggcagccccggcgccctgacgatagccgtg  
gtccttgccctggcctgaacagcctggccaaccacggcttccctcccccatagcggcaagaacatcaccatc  
atcgatctcctccgcggcgccctacctgggcctcgggtgttagccctgagatctccatcgtaggtggcgccgc  
cgagctcatcaagagctaccgcctcgccgccttcgatctccacgagctctccaaccacggcttcatcgatc  
atgattgctccctctccgcgcgcgacatcggcgacggtaacaacaacgacttcaacgagaccatctggagc  
gtgcctctggaggtcctgatgaactacaccatcatcaccctgaggccatcggcgcgcgctcgctctgctcg  
tgacctgttcgacatcgcccaacaacctaaaccagcagtgcggcgcccgctccatcgccatcggtgctctcg  
agaacggcctgctcatccagtccttgggcggaagcctgagctcgagtggtccgctccatcttcgagcag  
cagcgcatccctaccaacctgggcttcgcccccaagcccatcgctcctcaacaacgcggtggcgctcgccac  
cgtcggccttgaaagcctgctgtcccagcccaacctgaccgatctcctgggcagcgctgctgatcaagacc  
ctgccgacctgctggccgaggtgttcctgtcaaggagtacaacctcacctacatcctcgaggtcctgggc  
ctggccggccttccctgctgtggatctgtccttccctaccggctacaagaaggccatccagatcggcgccTA  
A

#### **UPO 2 from *Trichoderma harzianum* (ThaUPO 2)**

ATGctgctgtccaacgtcttctccttcgccgtgttcgccaccgcgcctacgcctctgtgcaggtccagca  
gtggatgcctcccgccccgcagatagccgggtcctgttccatgctcaacacctcgccaacctatggct  
acctccccactccggccgcgcataatcagcccttcccagatcgaggatgccttcaccaacttctcaacatc  
gaggccggccttcgccgcgcgcgctaaggacttcgccaaaggcctggggcaacgataccttcgatctcgatga  
tctgaacaccttgatatacctccagcacatcgccagcctgaccgcgcgacgactacacctcccgaacctc

acctcaagcctaacttcctccgcatcgagcgccctgatgtccgatatgccctacctccttcacgacgtcgac  
tccatcgccaagacccgcctccgcgtcgagagcgagtcaccccctaacgccctctccaagaaccagatgaa  
cgccgccctcttcgaggccgcatggtgctggtcatgatgtccgaccactcccctgacgccgagttcaacc  
ccccctgtccgcctaccagggccctaaggatcgcatccgcgcctggttcgagcaggagcgcttcctacc  
gagttcggctggcagcctagcgcccgaccatcaagctcgccgatctgaaccccgccatcaacggcatcat  
caagtccatggagcgccaggacaagagcggccgcgtcgctcagaagttctccaggatTAA
